# Supplementary material for: Upregulation of Circular RNA circATRNL1 to Sensitize Oral Squamous Cell Carcinoma to Irradiation
Source: PubMed Central journal article supplement — Mol Ther Nucleic Acids. 2020 Jan 10;19:961–73. doi: 10.1016/j.omtn.2019.12.031 (PMC7005496; doi:10.1016/j.omtn.2019.12.031), 2020-01-10
Supplement: mmc1.pdf [file mmc1.pdf]

**OMTN, Volume 19**

## **Supplemental Information**

**Upregulation of Circular RNA circATRNL1**

**to Sensitize Oral Squamous**

**Cell Carcinoma to Irradiation**

**Guanhui Chen, Yiming Li, Yi He, Binghui Zeng, Chen Yi, Chao Wang, Xiliu Zhang, Wei Zhao, and Dongsheng Yu**

## Supplemental Information

Supplemental Information includes two tables and five figures.

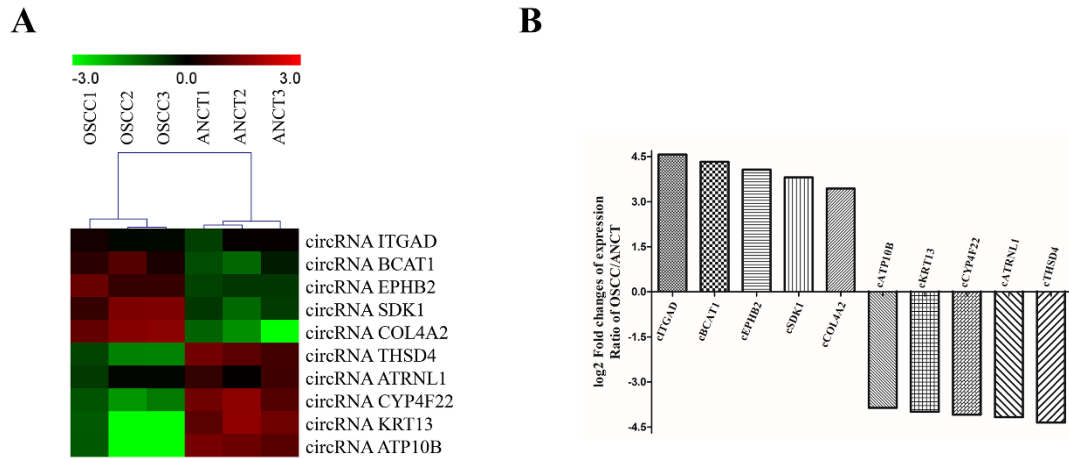

**Figure S1.** Hierarchical cluster analysis of circRNA expression profiling among the top five up- and downregulated circRNAs in OSCC (A), and the fold changes (B) are shown accordingly.

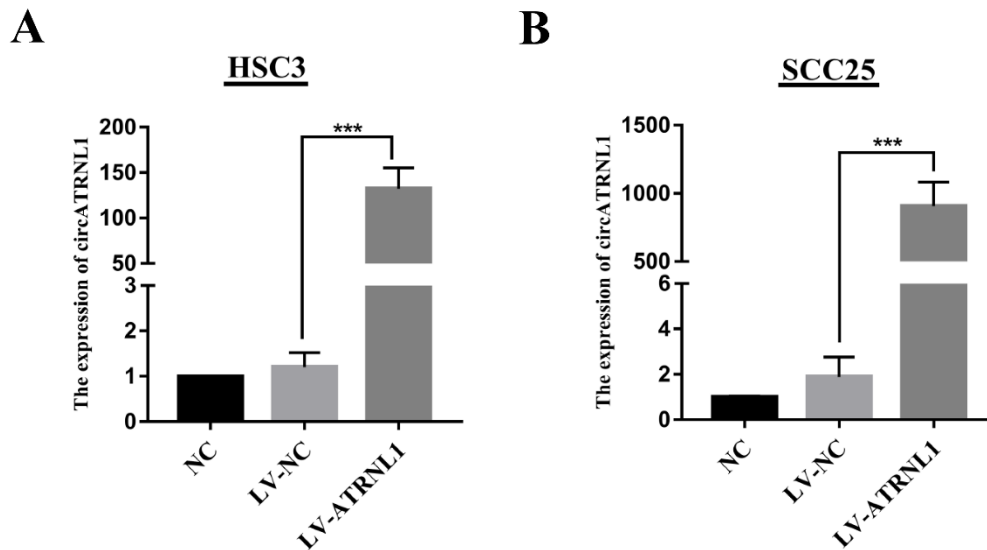

**Figure S2.** The transfection efficiencies of LV-ATRNL1 in HSC3 (A) and SCC25 (B) cells were measured by qRT-PCR. All results are indicated as mean  $\pm$  SD, n = 3. \*\*\* p < 0.001.

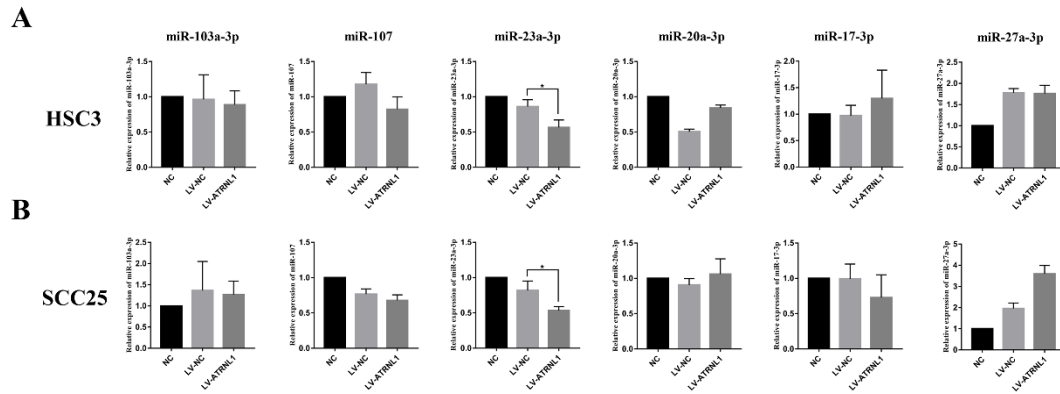

**Figure S3.** Relative expression of the six indicated miRNAs, including miR-103a-3p, miR-107, miR-23a-3p, miR-20a-3p, miR-17-3p, and miR-27a-3p, was evaluated by qRT-PCR in HSC3 (A) and SCC25 (B) cells. NC: Blank control; LV-NC: Negative control. Values are shown as mean  $\pm$  SD of triplicate experiments. \* $p < 0.05$ .

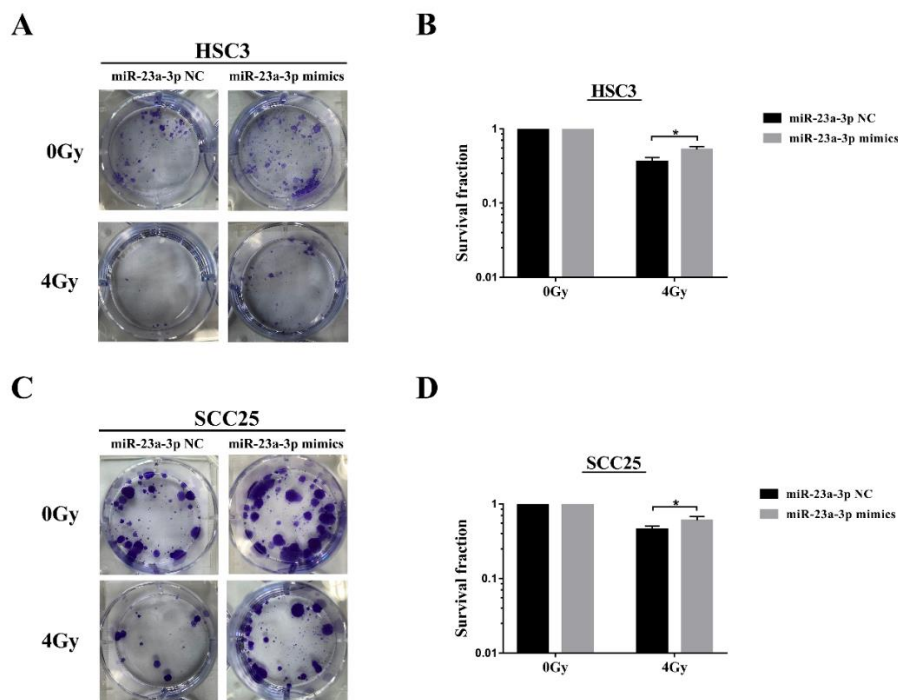

**Figure S4.** The clonogenic survival ability of transfected miR-23a-3p was determined by colony formation assay under 4Gy irradiation in HSC3 (A and B) and SCC25 (C and D) cells. All results are indicated as mean  $\pm$  SD,  $n = 3$ . \* $p < 0.05$ .

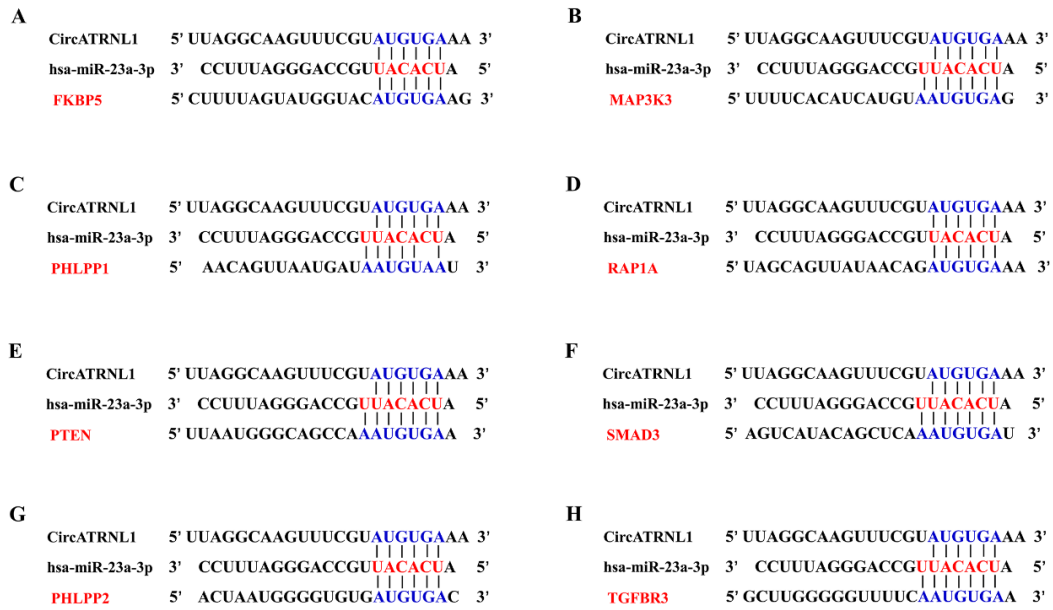

**Figure S5.** A sequence within the circATRNL1 and eight mRNAs, including FKBP5 (A), MAP3K3 (B), PHLPP1 (C), RAP1A (D), PTEN (E), SMAD3 (F), PHLPP2 (G), and TGFB3 (H), that are complementary to miR-23a-3p was identified by bioinformatics analysis.

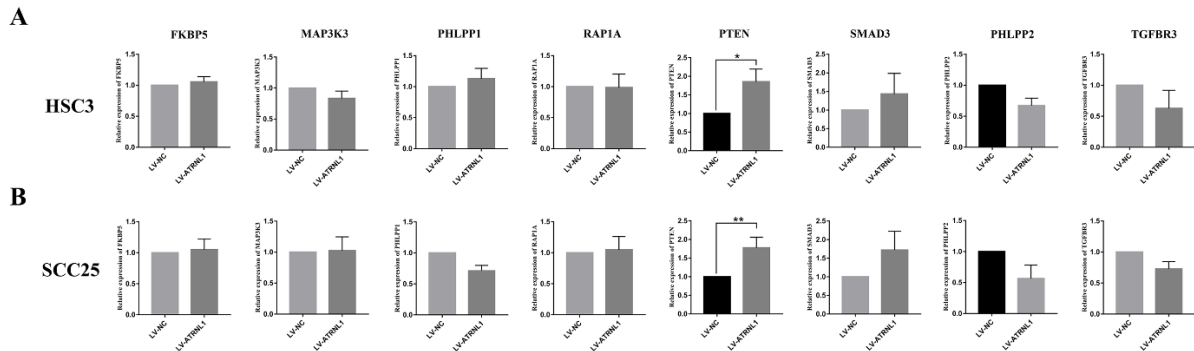

**Figure S6.** The expression of the eight indicated mRNAs, including FKBP5, MAP3K3, PHLPP1, RAP1A, PTEN, SMAD3, PHLPP2, and TGFB3, was analyzed by qRT-PCR in HSC3 (A) and SCC25 (B) cells transfected with LV-NV or LV-ATRNL1. Data are shown as mean  $\pm$  SD,  $n = 3$ .

\*  $p < 0.05$ , \*\*  $p < 0.01$ .

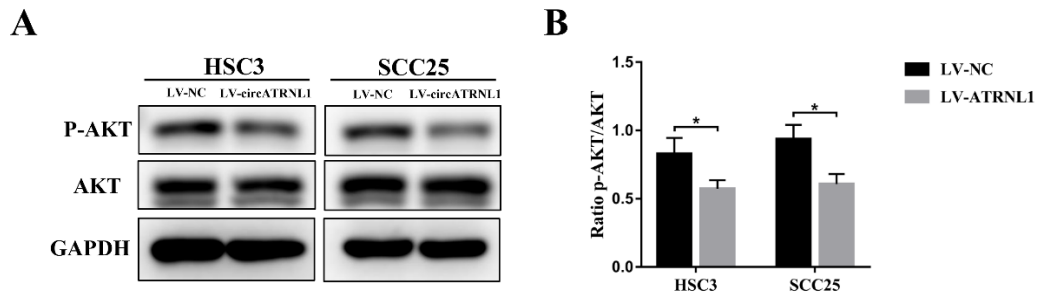

**Figure S7.** AKT and p-AKT levels of cells were measured by Western blot analysis after circATRNL1 overexpression (A), and quantitative analyses of them are presented (B). All values are presented as mean  $\pm$  SD, n = 3. \*p < 0.05.

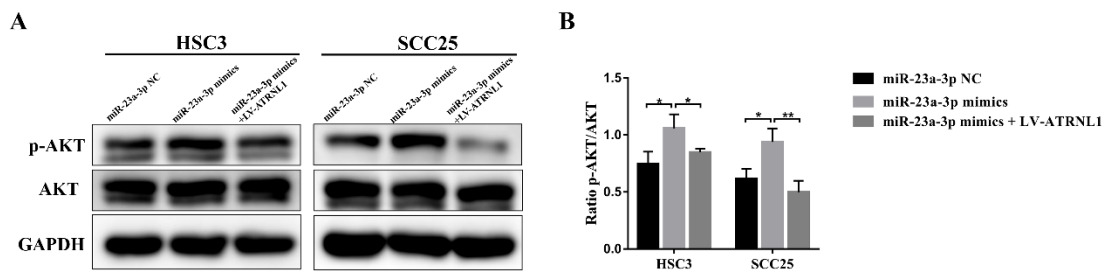

**Figure S8.** The levels of AKT and p-AKT were evaluated in OSCC cells after transfection (A), and the quantitative data were computed as a ratio to levels of GAPDH (B). Values are shown as mean  $\pm$  SD of triplicate experiments. \*p < 0.05, \*\*p < 0.01.

**Table S1. Primers used for RT-qPCR**

| Target             | Primer (5' to 3')                                  |
|--------------------|----------------------------------------------------|
| cITGAD-F           | 5'-AAGCGAAAACCTCGACAATC-3'                         |
| cITGAD-R           | 5'-CTTCCTGCACCTCGATCATC-3'                         |
| cBCAT1-F           | 5'-GATGTTTGGCTCTGGTACAG-3'                         |
| cBCAT1-R           | 5'-CCTTGTCACCTGGAAGAA-3'                           |
| cTHSD4-F           | 5'-GCATGACCAACCATGTCA-3'                           |
| cTHSD4-R           | 5'-GCTGGAGTCACAGTAACTCTCA-3'                       |
| cATRNL1-F          | 5'-ATCACATCCCAGTCTTTCCT-3'                         |
| cATRNL1-R          | 5'-GAGCCTAACATCCAAACTAAGC-3'                       |
| cCYP4F22-F         | 5'-CCACTGAAGTCATCCAGGAA-3'                         |
| cCYP4F22-R         | 5'-TCCACTTGTCACCTTTGCT-3'                          |
| has-miR-103a-3p-F  | 5'-ACACTCCAGCTGGGAGCAGCATTGTACAGGGC-3'             |
| has-miR-103a-3p-RT | 5'-CTCAACTGGTGTCGTGGAGTCGGCAATTCAGTTGAGTCATAGCC-3' |
| has-miR-107-F      | 5'-ACACTCCAGCTGGGAGCAGCATTGTACAGGGC-3'             |
| has-miR-107-RT     | 5'-CTCAACTGGTGTCGTGGAGTCGGCAATTCAGTTGAGTGATAGCC-3' |
| has-miR-23a-3p-F   | 5'-ACACTCCAGCTGGGATCACATTGCCAGGGATTT-3'            |
| has-miR-23a-3p-RT  | 5'-CTCAACTGGTGTCGTGGAGTCGGCAATTCAGTTGAGGGAAATCC-3' |
| has-miR-20a-3p-F   | 5'-ACACTCCAGCTGGGACTGCATTATGAGCACTT-3'             |
| has-miR-20a-3p-RT  | 5'-CTCAACTGGTGTCGTGGAGTCGGCAATTCAGTTGAGCTTTAAGT-3' |
| has-miR-17-3p-F    | 5'-ACACTCCAGCTGGGACTGCAGTGAAGGCACTT-3'             |
| has-miR-17-3p-RT   | 5'-CTCAACTGGTGTCGTGGAGTCGGCAATTCAGTTGAGCTACAAGT-3' |
| has-miR-27a-3p-F   | 5'-ACACTCCAGCTGGGTTTACAGTGGCTAAGTTCC-3'            |
| has-miR-27a-3p-RT  | 5'-CTCAACTGGTGTCGTGGAGTCGGCAATTCAGTTGAGGCGGAACT-3' |
| miRNA-R            | 5'-CTCAACTGGTGTCGTGGA-3'                           |
| U6-F               | 5'-CTCGCTTCGGCAGCACA-3'                            |
| U6-R               | 5'-AACGCTTCACGAATTTGCGT-3'                         |
| U6-RT              | 5'- AACGCTTCACGAATTTGCGT-3'                        |
| ATRNL1-F           | 5'-GTGGCTGCTGTGGTATGGAA-3'                         |
| ATRNL1-R           | 5'-ATGGCCCTCGCAGAACTCT-3'                          |
| FKBP5-F            | 5'-TCTGTTCTGGCGTGAGTTGT-3'                         |
| FKBP5-R            | 5'-AGAGCCATGCTCAATCTGTT-3'                         |
| MAP3K3-F           | 5'-CGAGACTCTGCTGGGAATGT-3'                         |
| MAP3K3-R           | 5'-TGATCACCTCAGGGCTCATC-3'                         |
| PHLPP1-F           | 5'-ACTGAGGATGGCAAGGTGAA-3'                         |
| PHLPP1-R           | 5'-CAACCCCTTACTGCCTAGGA-3'                         |
| RAP1A-F            | 5'-GGCTTGGTGGTATCCCTGAA-3'                         |
| RAP1A-R            | 5'-TTGCAGTGAGCGGAGACTGA-3'                         |
| PTEN-F             | 5'-GTCAGAGGCGCTATGTGTATTA-3'                       |
| PTEN-R             | 5'-TTAGCTGGCAGACCACAA-3'                           |
| SMAD3-F            | 5'-GCACAGCCAGTTCTGAATGT-3'                         |
| SMAD3-R            | 5'-GTGAGTGAAGGCTTCTTGGA-3'                         |
| PHLPP2-F           | 5'-ACAGCCTGAACCTCATTGAA-3'                         |

|                  |                                                          |
|------------------|----------------------------------------------------------|
| PHLPP2-R         | 5'-GTCATGAGGCACAACAAACT-3'                               |
| TGFBR3-F         | 5'-GTTGGGTGAGTCCTATGTGAT-3'                              |
| TGFBR3-R         | 5'-GCTGACACACTGAACAGAGAA-3'                              |
| β-actin-F        | 5'-TGGATCAGCAAGCAGGAGTA-3'                               |
| β-actin-R        | 5'-TCGGCCACATTGTGAACTTT-3'                               |
| si-PTEN          | 5'-CCCACCACAGCTAGAACTT-3'                                |
| circATRNL1-WT-F  | 5'-CCGCTCGAGGTGATTATATGTGGGTGTGATTCATTG-3'               |
| circATRNL1-WT-R  | 5'-ATAAGAATGCGGCCGCTCAAGCCAGAGCTGGGAAGCTGGAA-3'          |
| circATRNL1-mut-F | 5'-AAGTTTCGTCGAGACAAACCTCAGTTTTGAAGATAAGTAAGTGAGGAGAT-3' |
| circATRNL1-mut-R | 5'-GGTTTGTCTCGACGAAACTTGCCTAAACTCCATAAACACATCTGTTAGG-3'  |
| PTEN-WT-F        | 5'-CCGCTAGAGATTTTTTTTTTATCAAGAGGGATAAAA-3'               |
| PTEN-WT-R        | 5'-ATAAGAATGCGGCCGCATCAATCAATACTCTATATATCAAT-3'          |
| PTEN-mut-F       | 5'-ATTGTAAAGCTCCGAGACCGATATTATTA AAAAGGTTTTTTTTTC-3'     |
| PTEN-mut-R       | 5'-ATCGGTCTCGGAGCTTTACAATAGTAGTTGTACTCCGCTTAAAAT-3'      |

**Table S2. The target microRNAs of CircRNA ATRNL1 predicted by Miranda and TargetScan software**

| CircRNA     | microRNA        | Miranda<br>max_score | Miranda<br>max_Energy | TargetScan<br>_score | TargetScan<br>_score_percentile |
|-------------|-----------------|----------------------|-----------------------|----------------------|---------------------------------|
| Circ ATRNL1 | hsa-miR-103a-3p | 152                  | -15.54                | -0.20                | 76                              |
| Circ ATRNL1 | hsa-miR-107     | 152                  | -11.47                | -0.20                | 76                              |
| Circ ATRNL1 | hsa-miR-23a-3p  | 150                  | -12.73                | -0.19                | 68                              |
| Circ ATRNL1 | hsa-miR-20a-3p  | 151                  | -15.57                | -0.26                | 84                              |
| Circ ATRNL1 | hsa-miR-17-3p   | 143                  | -17.03                | -0.19                | 78                              |
| Circ ATRNL1 | hsa-miR-27a-3p  | 154                  | -14.80                | -0.14                | 55                              |
